# Supplementary material
Source: Springer Nature journal article supplement (https://www.springermedizin.de/resource/supplementary/13048_2013_193_MOESM3_ESM.pdf/9665106)

**A**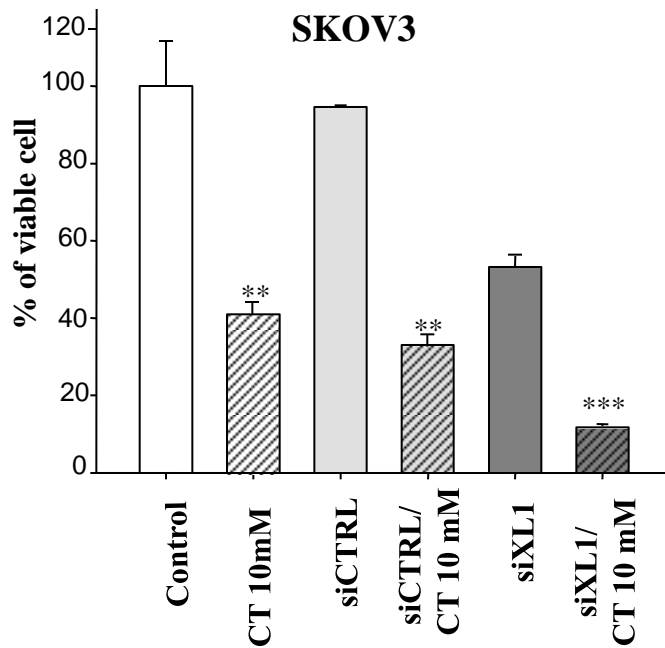**B**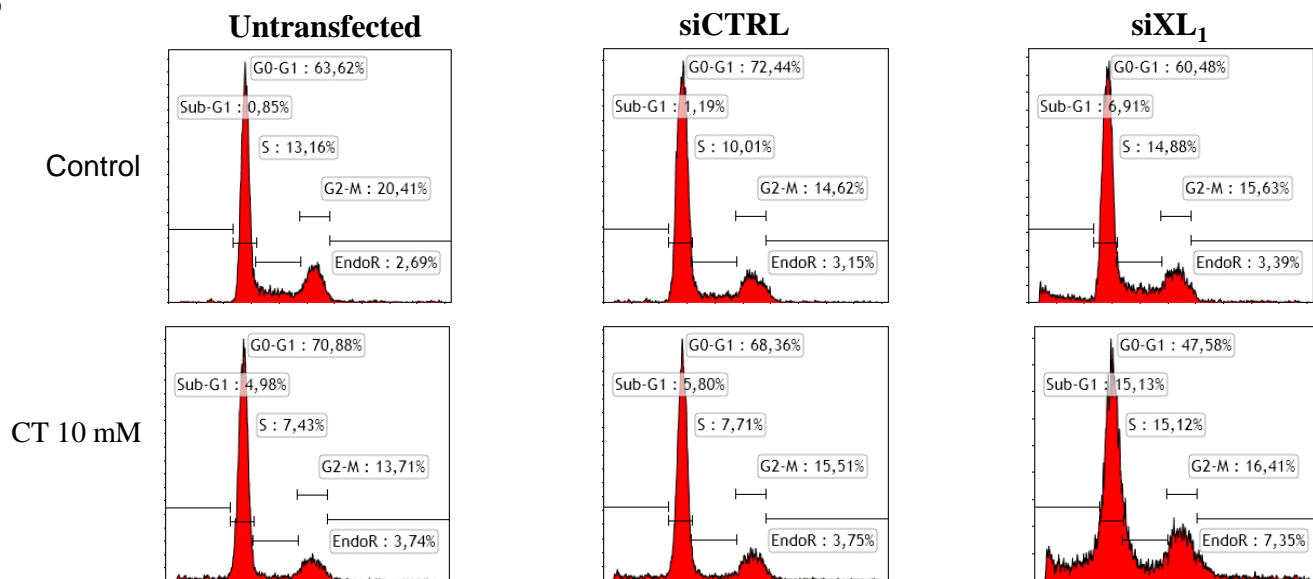**C**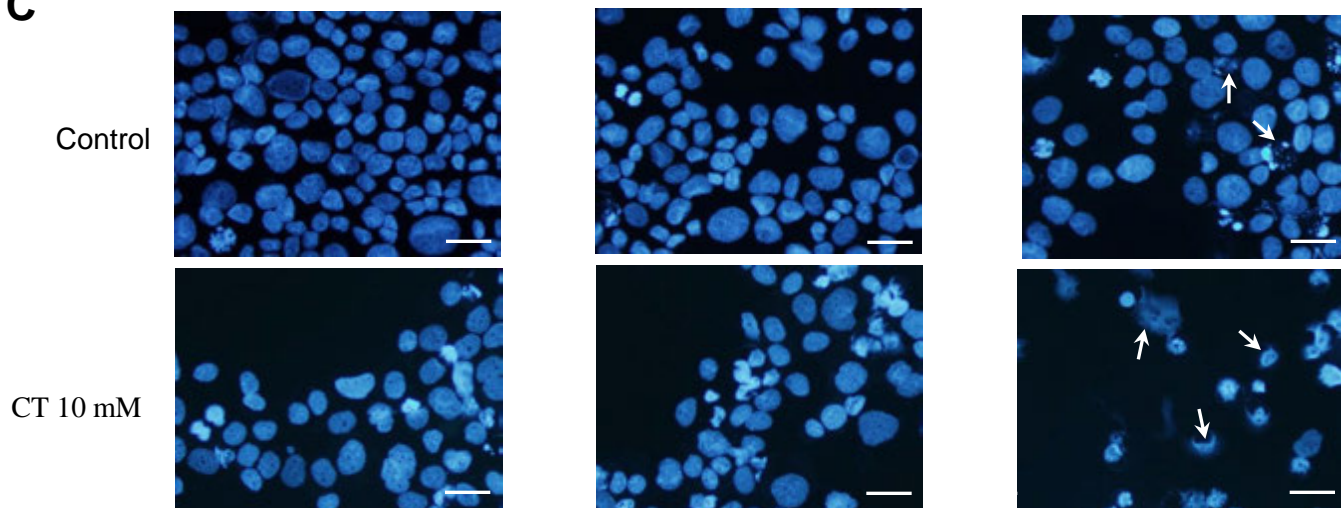

Supplement: MOESM3 [file 9665106]
